# Supplementary material
Source: PubMed Central journal article supplement (PMC7797355)
Supplement: 11481_2020_9979_MOESM1_ESM.pdf [file 11481_2020_9979_MOESM1_ESM.pdf]

**ACE-2-interacting domain of SARS-CoV-2 (AIDS) peptide suppresses inflammation to reduce fever and protect lungs and heart in mice: Implications for COVID-19 therapy**

**Ramesh K. Paidi<sup>1,\*</sup>, Malabendu Jana<sup>1,\*</sup>, Rama K. Mishra<sup>2</sup>, Debashis Dutta<sup>1</sup>, Sumita Raha<sup>1</sup>,  
and Kalipada Pahan<sup>1,3</sup>**

<sup>1</sup>Department of Neurological Sciences, Rush University Medical Center, Chicago, USA;

<sup>2</sup>Department of Biochemistry and Molecular Genetics, Feinberg School of Medicine, Northwestern University, Chicago, USA; <sup>3</sup>Division of Research and Development, Jesse Brown Veterans Affairs Medical Center, Chicago, USA

\*First two authors have equal contribution to the work.

Running title: AIDS peptide for COVID-19

Corresponding author:

Kalipada Pahan, Ph.D.

Department of Neurological Sciences

Rush University Medical Center

1735 West Harrison St

Suite Cohn 310

Chicago, IL 60612

Tel: (312) 563-3592; Fax: (312) 563-3571

Email: [Kalipada\\_Pahan@rush.edu](mailto:Kalipada_Pahan@rush.edu)

## Legend to supplementary figures:

**Figure S1. Dose-dependent induction of IL-6 and IL-1 $\beta$  by recombinant SARS-CoV-2 spike S1 in human A549 lung cells.** Human A549 lung cells were stimulated with different doses of recombinant SARS-CoV-2 spike S1 under serum-free condition for 4 h followed by monitoring the mRNA expression of IL-6 and IL-1 $\beta$  by semi-quantitative RT-PCR (A) and real-time PCR (B, IL-6; C, IL-1 $\beta$ ). In parallel experiment, cells were also stimulated with boiled SARS-CoV-2 spike S1. In this case, SARS-CoV-2 spike S1 was boiled for 5 min. Results are mean  $\pm$  SD of three independent experiments. \*\*\*  $p < 0.001$ .

**Figure S2. Suppression of SARS-CoV-2 spike S1-mediated expression of IL-6 and IL-1 $\beta$  in human A549 lung cells by neutralizing antibodies against spike S1.** Human A549 lung cells pretreated with different concentrations of either anti-spike S1 antibody or control IgG for 5 min were stimulated with 1 ng/ml recombinant SARS-CoV-2 spike S1 under serum-free condition for 4 h followed by monitoring the mRNA expression of IL-6 and IL-1 $\beta$  by semi-quantitative RT-PCR (A) and real-time PCR (B, IL-6; C, IL-1 $\beta$ ). Results are mean  $\pm$  SD of three independent experiments. \*\*\*  $p < 0.001$ .

**Figure S3. Effect of wtAIDS and mAIDS peptides on the mRNA expression of IL-6 and IL-1 $\beta$  in SARS-CoV-2 spike S1-, poly IC-, HIV tat-, and flagellin-stimulated human A549 lung cells.** Human A549 lung cells pretreated with different concentrations of wtAIDS and mAIDS peptides for 15 min were stimulated with recombinant SARS-CoV-2 spike S1 (A), polyIC (B), HIV-1 Tat- (C), and flagellin (D) under serum-free condition for 4 h followed by monitoring the mRNA expression of IL-6 and IL-1 $\beta$  by semi-quantitative RT-PCR. Results represent three independent experiments.

**Figure S4. Schematic presentation of different cardiac parameters.**

**Figure S5. Intranasal delivery of wtAIDS peptide improves locomotor activities in a mouse model of COVID-19.** Six-eight week old C57/BL6 mice (n=6) of both sexes were treated intranasally with wtAIDS or mAIDS peptides (100 ng/mouse/d). After 10 min, mice were intoxicated with recombinant SARS-CoV-2 spike S1 (50 ng/mouse/d) via intranasal route. After 7d of treatment, mice were tested for general locomotor activities (A, heat map; B, distance travelled; C, velocity; D, cumulative duration; E, rotorod latency). Results are mean  $\pm$  SEM of six mice per group. \*  $p < 0.05$ ; \*\*  $p < 0.01$ ; \*\*\*  $p < 0.001$ .

**Figure S6. Intranasal delivery of wtAIDS peptide in a treatment paradigm improves locomotor activities in a mouse model of COVID-19.** Six-eight week old C57/BL6 mice (n=5) of both sexes were treated intranasally with wtAIDS peptide (100 ng/mouse/d) from 1 d after intoxication of SARS-CoV-2 spike S1 (50 ng/mouse/d). After 7d of wtAIDS treatment, mice were tested for general locomotor activities (A, heat map; B, distance travelled; C, velocity; D, cumulative duration; E, rotorod latency). Results are mean  $\pm$  SEM of five mice per group. \*\*  $p < 0.01$ ; \*\*\*  $p < 0.001$ .

|                         |   |     |     |     |    |    |     |     |     |    |    |
|-------------------------|---|-----|-----|-----|----|----|-----|-----|-----|----|----|
| Spike S1 (ng/ml)        | 0 | 0.2 | 0.5 | 1.0 | 10 | 20 | 0   | 0   | 0   | 0  | 0  |
| Boiled spike S1 (ng/ml) | 0 | 0   | 0   | 0   | 0  | 0  | 0.2 | 0.5 | 1.0 | 10 | 20 |

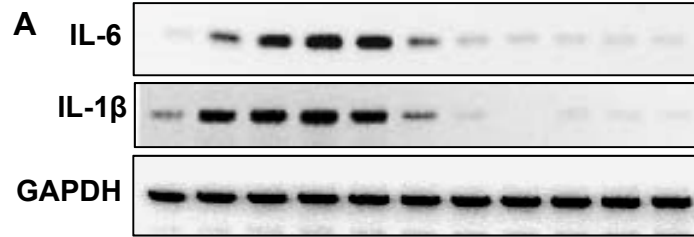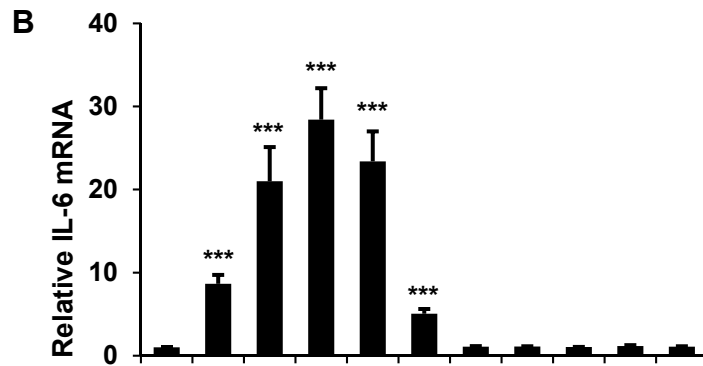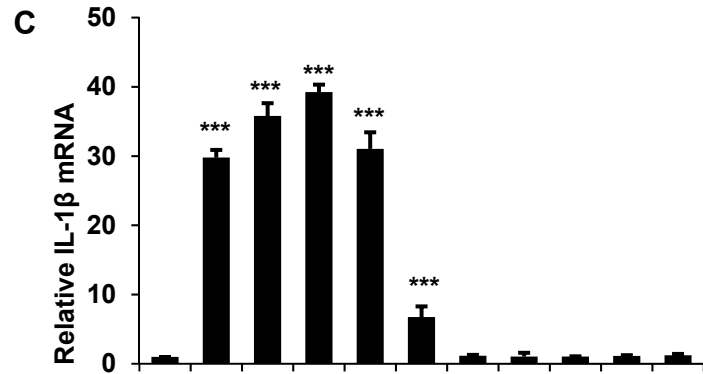

Figure S1

|                          |   |   |     |     |     |     |
|--------------------------|---|---|-----|-----|-----|-----|
| Spike S1 (ng/ml)         | 0 | 1 | 1   | 1   | 1   | 1   |
| Anti-Spike S1 Ab (μg/ml) | 0 | 0 | 0.2 | 0.5 | 0   | 0   |
| IgG (μg/ml)              | 0 | 0 | 0   | 0   | 0.2 | 0.5 |

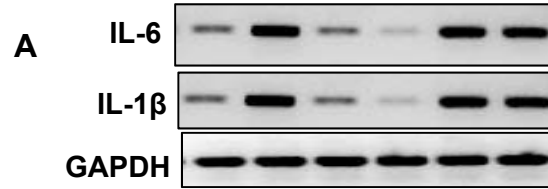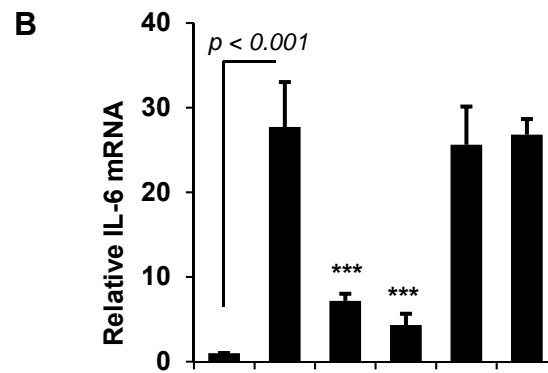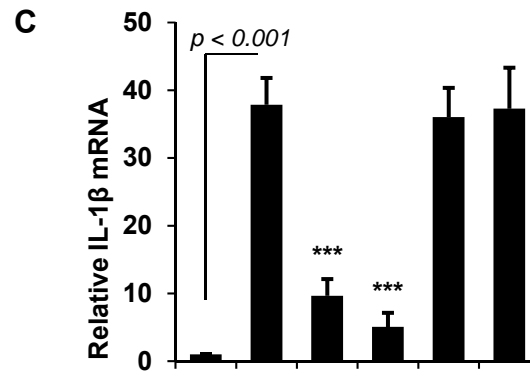

**Figure S2**

|                    |   |   |   |   |   |   |
|--------------------|---|---|---|---|---|---|
| Spike S1 (1 ng/ml) | - | + | + | + | + | + |
| wtAIDS ( $\mu$ M)  | - | - | 2 | 5 | - | - |
| mAIDS ( $\mu$ M)   | - | - | - | - | 2 | 5 |

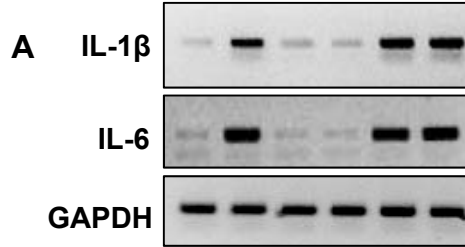

|                   |   |   |   |   |   |   |
|-------------------|---|---|---|---|---|---|
| Poly-IC (50ug/ml) | - | + | + | + | + | + |
| wtAIDS ( $\mu$ M) | - | - | 2 | 5 | - | - |
| mAIDS ( $\mu$ M)  | - | - | - | - | 2 | 5 |

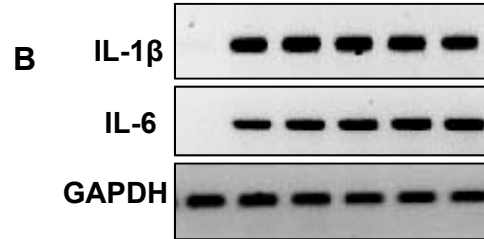

|                   |   |   |   |   |   |   |
|-------------------|---|---|---|---|---|---|
| Tat (200ng/ml)    | - | + | + | + | + | + |
| wtAIDS ( $\mu$ M) | - | - | 2 | 5 | - | - |
| mAIDS ( $\mu$ M)  | - | - | - | - | 2 | 5 |

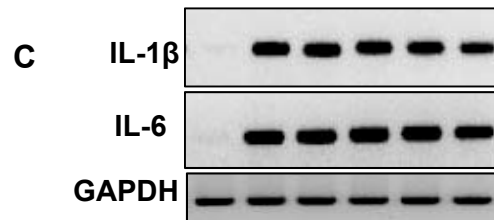

|                       |   |   |   |   |   |   |
|-----------------------|---|---|---|---|---|---|
| Flagellin (1 $\mu$ M) | - | + | + | + | + | + |
| wtAIDS ( $\mu$ M)     | - | - | 2 | 5 | - | - |
| mAIDS ( $\mu$ M)      | - | - | - | - | 2 | 5 |

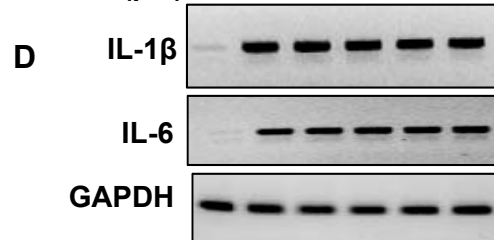

**Figure S3**

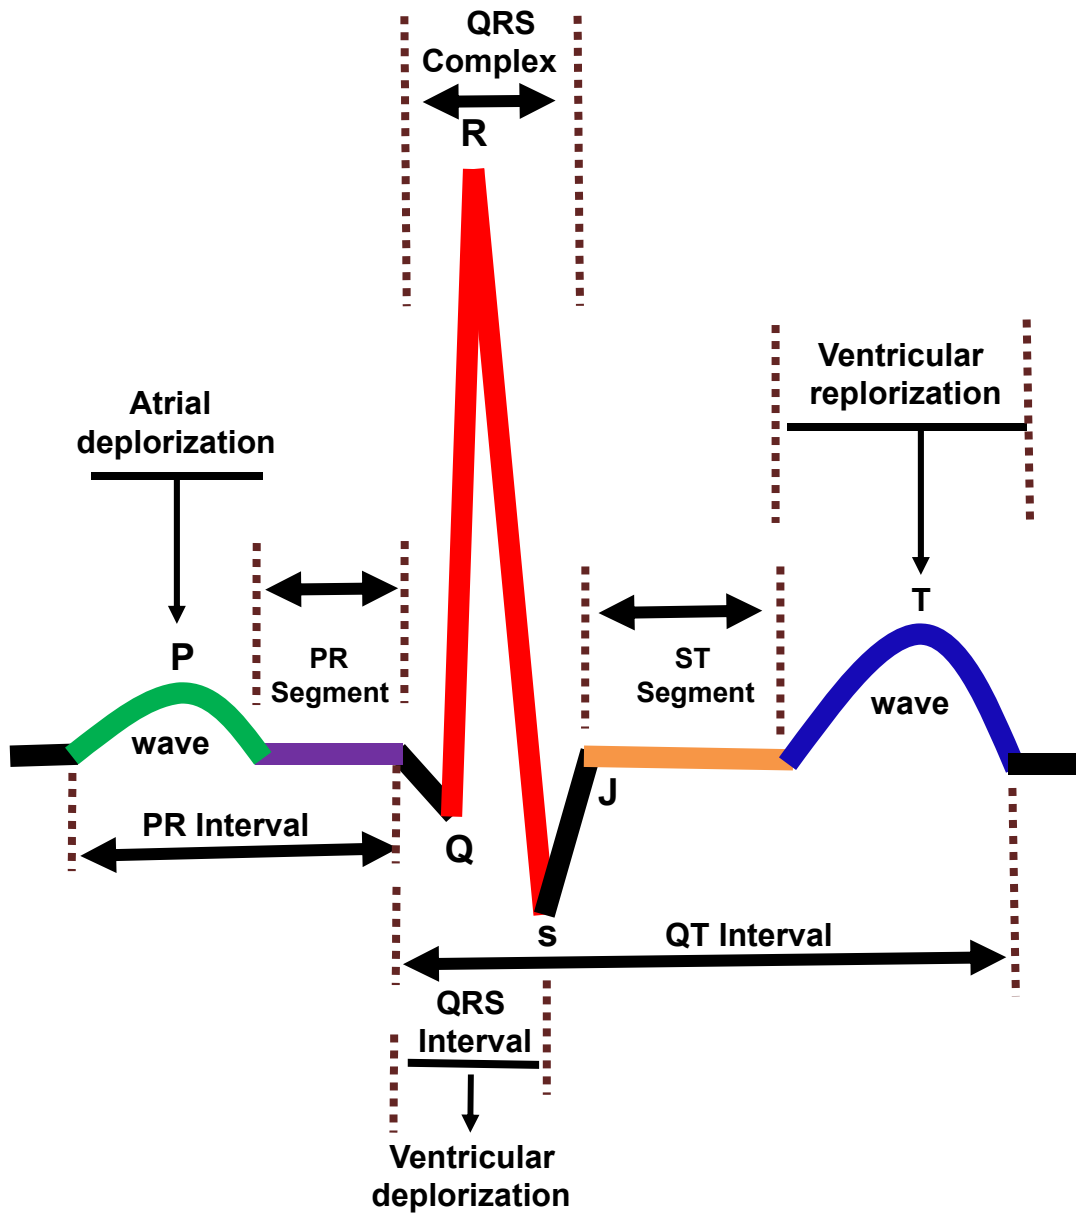

Figure S4

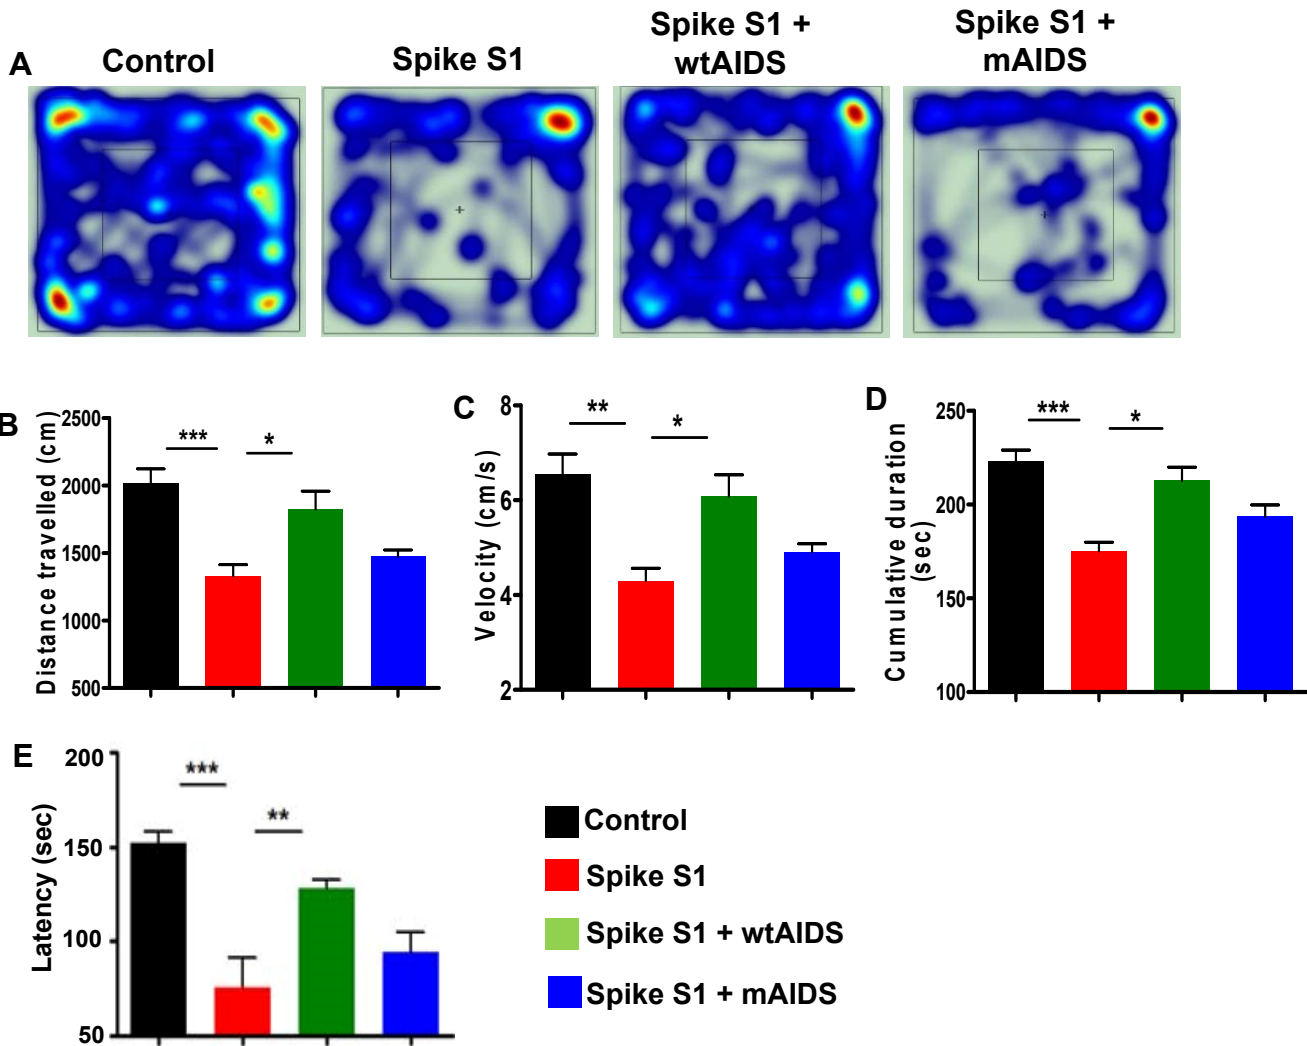

Figure S5

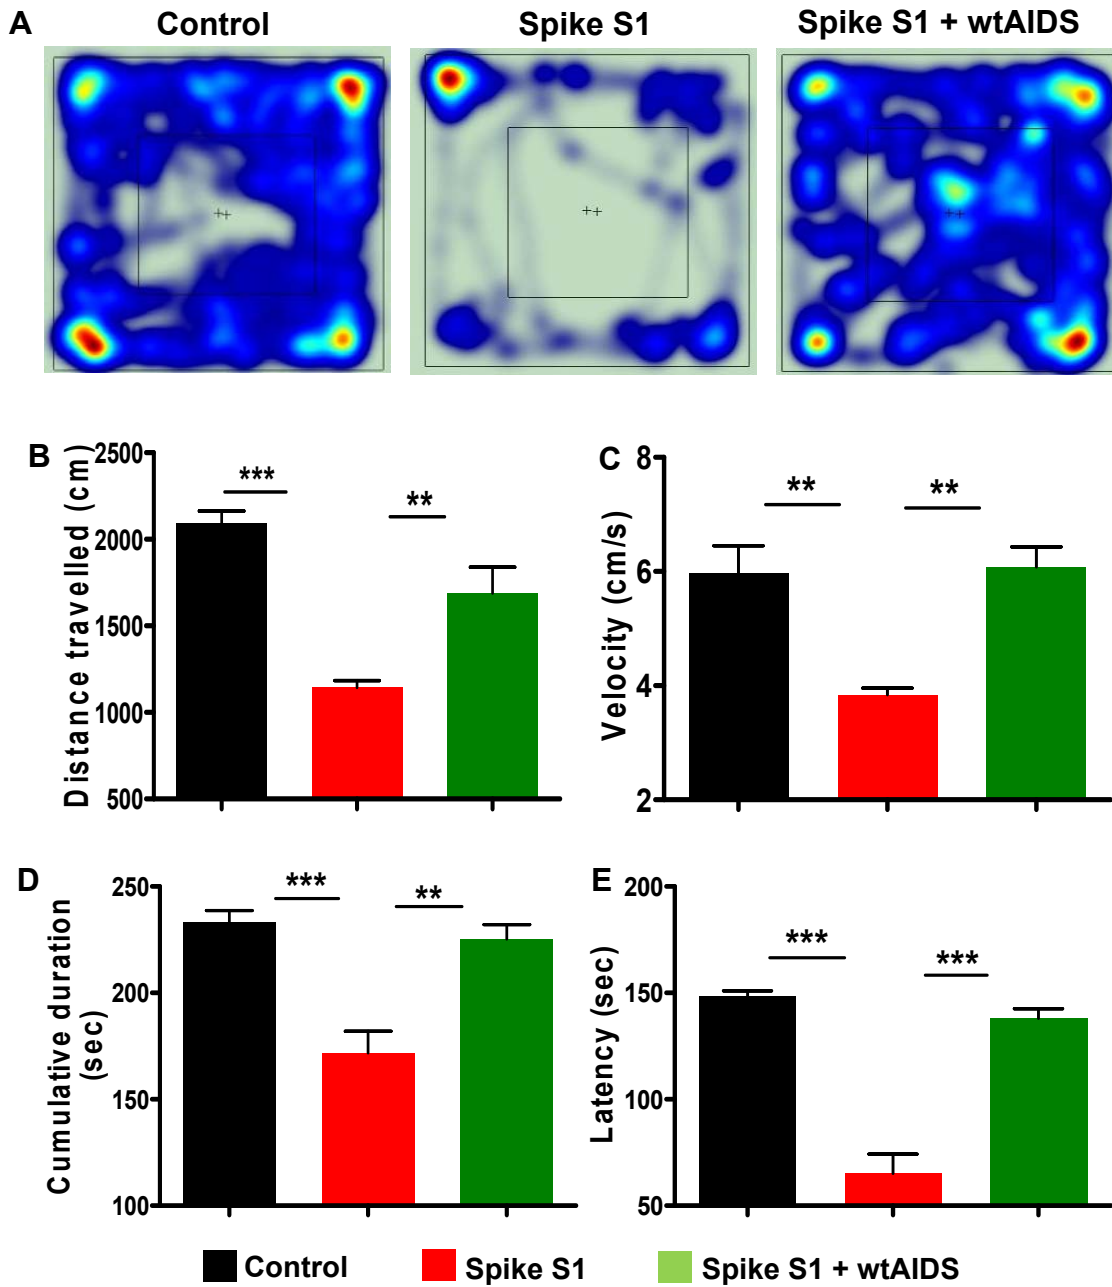

Figure S6



**Table S1. Lung injury scoring system**

|    | Parameter                                 | Score per field |       |     |
|----|-------------------------------------------|-----------------|-------|-----|
|    |                                           | 0               | 1     | 2   |
| A. | Neutrophils in the alveolar space         | None            | 1-5   | >5  |
| B. | Neutrophils in the interstitial space     | None            | 1-5   | >5  |
| C. | Hyaline membranes                         | None            | 1     | >1  |
| D. | Proteinaceous debris filling the airspace | None            | 1     | >1  |
| E. | Alveolar Septal thickening                | < 2x            | 2X-4X | >4x |

$$\text{Lung Injury Score} = \frac{[(20 \times A) + (14 \times B) + (7 \times C) + (7 \times D) + (2 \times E)]}{(\text{number of fields} \times 100)}$$
